# Supplementary material for: A Novel Highly Divergent Protein Family Identified from a Viviparous Insect by RNA-seq Analysis: A Potential Target for Tsetse Fly-Specific Abortifacients
Source: PLoS Genet. 2014 Apr 24;10(4):e1003874. doi: 10.1371/journal.pgen.1003874 (PMC3998918; doi:10.1371/journal.pgen.1003874)
Supplement: Table S1 — Quantitative PCR primers and siRNA used for injection. (XLSX) [file pgen.1003874.s009.xlsx]

## Sheet: Table S1 Primers
					Forward		Reverse
			quantitative PCR
			Glossina morsitans
			28s rRNA		GTGATATAATGTGCCCAGTG		TGGTATCTGCATGAGTTGTT
			Milk gland protein 1		CTGGATCTTGACCCGTGAAC		GGGGAAGTGATGTTCCTTGA
			Milk gland protein 2		ACCTATGATGTTACTGAATACTT		TTGAGCGAATTGTCTGTAG
			Milk gland protein 3		ACCTACTTGTCCAATGTT		GTTACGGCGATGTCATAT
			Milk gland protein 4		AGAGCCATCAAGGAACAC		AGCGAATTGTCTGTAGCA
			Milk gland protein 5		CTACCTTTGGCAGATTTG		GCTTAGAATTGACGAACAT
			Milk gland protein 6		GACAAGGTGTTCACTAAG		CCAAGAGTAGGGAAGAAT
			Milk gland protein 7		AGAAATGTATGCCCTGAA		TGAGTGTAGACATTGTAGAA
			Milk gland protein 8		CGTTCTTGAGGAAGTCATC		ATCATTGGGAAT CATTTCGTAGA
			Milk gland protein 9		GTTGCTGGCGATTATACC		TCAAAGACATCAGTGGAGTA
			Milk gland protein 10		CGTAACAAGTCCTATAACATCTA		ATGGCGTATTCGTAGTTG
			Acid sphingomyelinase 1		AAGACCATGAAGCAGAAT		CCGTTGTTGTTGTTAGAG
			Transferrin		CATCCACGCTAACAACTA		AAGTAGGTTCCACAACAG
			Peptidoglycan recognition protein-lb		TCAATGATGGGTTGGATGAA		GAACGATCACAAACGCAGAA
			Cu/Zn superoxide dismutase		TGAGAAAACCTCGAAAATTG		ATGCCAGTGAGATAAACTCG
			Catalase		GATTCAGGTGGGTAAGTTGA		ACAGACGTCCCTGTAACATC
			Tubulin		CCATTCCCACGTCTTCACTT		GACCATGACGTGGATCACAG
			Glossina fuscipes
			Milk gland protein 2		CTCAATTCTTCCCCAGCA		GAATTCTTTGACGGCAGT
			Milk gland protein 5		GCTGCTGTTGACCAATTT		GGCCCAGGTCTTGTAAAA
			NADH subunit 2		TTCAACACTTTTAAGGTTTCTCA		AAGGGAGGAAGACCTCCTAA
			Glossina pallidipes
			Milk gland protein 3		CTTCCCCCATGACTTTAT		ACCGAAGACAGCAAAAGA
			Milk gland protein 4		TACTTCGGCCGCTTCTAC		AGTTTGGACTTCGTTGGG
			28S		AGGCCATTTACCCAAAGA		AGTTTACCACCCACTTAG
			Sarcophaga crassipalpis
			Milk gland protein-like protein		TATGTGGATGAGGAACATGA		GTAAAGGAGGGCGTTAATTT
			Rp49		AAGAAGCGCACCAAGCACTTCATC		ACTTCTTGAAGCCAGTTGGGAGCA
			siRNA
			GFP		CUUGACUUCAGCACGUGUCUUGUAGUU		CUACAAGACACGUGCUGAAGUCAAG
			Drop		GAAGCUACACUAAAGUUACUUAACCUU		GGUUAAGUAACUUUAGUGUAGCUTC
			Ladybird late
			Nubbin		AGUUAAAUUUAAAGCUGCCUCCUCCAC		TCAAUUUAAAUUUCGACGGAGGAGG
			MGP5		UAGGGAAGAAGCAACAGCGUUGUCCUU		GGACAACGCUGUUGCUUCUUCCCTA
			MGP7		ACAUCAUAAGAUUUCAAGAUUUCGGUU		CCGAAAUCUUGAAAUCUUAUGAUGT
			MGP8		UGUUCCAAAUAUUUGCUUAAGGUGGUU		CCACCUUAAGCAAAUAUUUGGAACA
			MGP9		UGAAGAAUUCAGGAGUGAACAAUUGUU		CAAUUGUUCACUCCUGAAUUCUUCA
			Teashirt		UGAACUAGCCACACCCUUGUUCUGCCA		GCAGAACAAGGGUGUGGCUAGUUCA
