# Supplementary material for: A Novel Highly Divergent Protein Family Identified from a Viviparous Insect by RNA-seq Analysis: A Potential Target for Tsetse Fly-Specific Abortifacients
Source: PLoS Genet. 2014 Apr 24;10(4):e1003874. doi: 10.1371/journal.pgen.1003874 (PMC3998918; doi:10.1371/journal.pgen.1003874)
Supplement: Table S8 — Amino acid composition of milk gland proteins 2–10 as percent amino acids per protein. Total represents the average percent across MGP2–10. Highlighted are the essential amino acids. (XLSX) [file pgen.1003874.s016.xlsx]

## Sheet: Table S8
					MGP2		MGP3		MGP4		MGP5		MGP6		MGP7		MGP8		MGP9		MGP10		Total
			Ala (A) 12		9.6		5.3		10.2		10.5		6.8		6.5		7.3		8.8		8.1		8.12222
			Arg (R) 7		3.4		2.1		3.4		2.1		2.8		3.8		1.7		3.5		2.9		2.85556
			Asn (N) 10		5.1		3.2		6.2		6.3		4		5.4		5		2.4		4		4.62222
			Asp (D) 4		1.7		3.2		1.7		1		1.7		2.2		1.7		2.4		2.3		1.98889
			Cys (C) 2		0.6		0		0.6		0		0.6		1.1		0		0		1.2		0.455556
			Gln (Q) 6		5.6		2.1		5.6		4.7		5.1		3.3		2.8		4.7		4		4.21111
			Glu (E) 15		7.3		8.6		7.3		7.9		9.7		8.2		8.4		8.2		8.7		8.25556
			Gly (G) 3		2.8		3.2		2.8		1.6		2.8		1.6		3.4		2.4		2.9		2.61111
			His (H) 6		3.4		5.9		3.4		3.1		3.4		3.3		7.3		2.4		2.9		3.9
			Ile (I) 10		1.7		3.7		0.6		2.6		5.7		5.4		3.9		2.4		4		3.33333
			Leu (L) 14		5.6		8.6		6.2		9.4		8		7.6		8.4		7.1		5.8		7.41111
			Lys (K) 11		3.4		6.4		3.4		4.2		6.8		6		3.4		5.3		6.9		5.08889
			Met (M) 3		1.7		1.1		1.7		1		2.8		1.6		5		1.8		2.3		2.11111
			Phe (F) 18		14.7		12.8		14.1		14.7		21		9.8		8.9		15.9		14.5		14.0444
			Pro (P) 11		5.6		4.8		4		5.8		4		6		7.3		6.5		4		5.33333
			Ser (S) 7		1.1		2.7		1.1		4.2		2.8		3.8		3.4		0.6		1.7		2.37778
			Thr (T) 13		7.3		9.6		6.8		4.2		5.1		7.1		6.7		8.2		6.4		6.82222
			Trp (W) 2		1.1		0		1.7		2.1		0.6		1.1		2.8		1.2		1.2		1.31111
			Tyr (Y) 12		9		6.4		9.6		4.2		4		6.5		5.6		7.6		8.7		6.84444
			Val (V) 18		9		10.2		9.6		10.5		2.3		9.8		7.3		8.8		7.5		8.33333
